# Supplementary material for: Understanding the synthesis mechanism, chemical structures and optical properties of aromatic carbon nitride
Source: Royal Society of Chemistry journal article supplement (doi:10.1039/d4qi00355a), 2024-01-01
Supplement: d4qi00355a1.pdf [file d4qi00355a1.pdf]

## Supporting Information

# Understanding the synthesis mechanism, chemical structures and optical properties of aromatic carbon nitride

Yunhu Wang<sup>1,#</sup>, Fangxu Dai<sup>1,2,#</sup>, Yafei Tao, Kai Zhang<sup>1</sup>, Bingjie Li<sup>1</sup>, Mingming Zhang<sup>1,3</sup>, Kang Liu<sup>1</sup>, Jixiang Xu<sup>1</sup>, Lei Wang<sup>1</sup>, Jun Xing<sup>1,\*</sup>

<sup>1</sup>Key Laboratory of Eco-chemical Engineering, Ministry of Education, College of Chemistry and Molecular Engineering, Qingdao University of Science & Technology, 266042 Qingdao, China.

<sup>2</sup>School of Pharmacy, Jining Medical University, 276800 Rizhao, China.

<sup>3</sup>College of Sino-German Science and Technology, Qingdao University of Science & Technology, Qingdao 266042, China.

#These authors contribute equally.

\*Correspondence: xingjun@qust.edu.cn

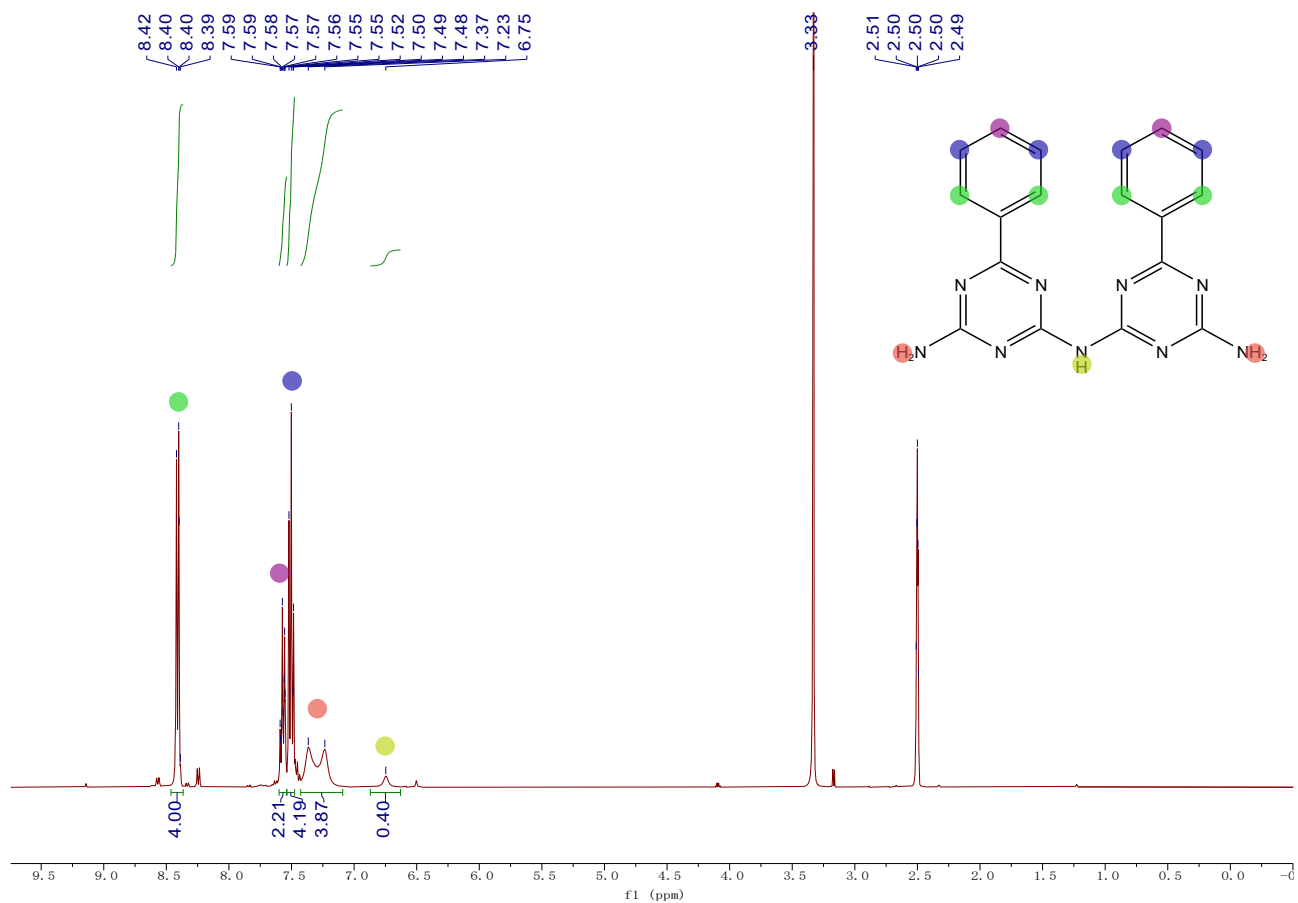

**Figure S1.**  $^1\text{H}$  NMR spectrum of DPT dimer.

$^1\text{H}$  NMR (400 MHz, DMSO- $d_6$ )  $\delta$  8.44 – 8.37 (m, 4H), 7.62 – 7.53 (m, 2H), 7.50 (t,  $J = 7.4$  Hz, 4H), 7.30 (d,  $J = 52.9$  Hz, 4H), 6.75 (s, 1H).

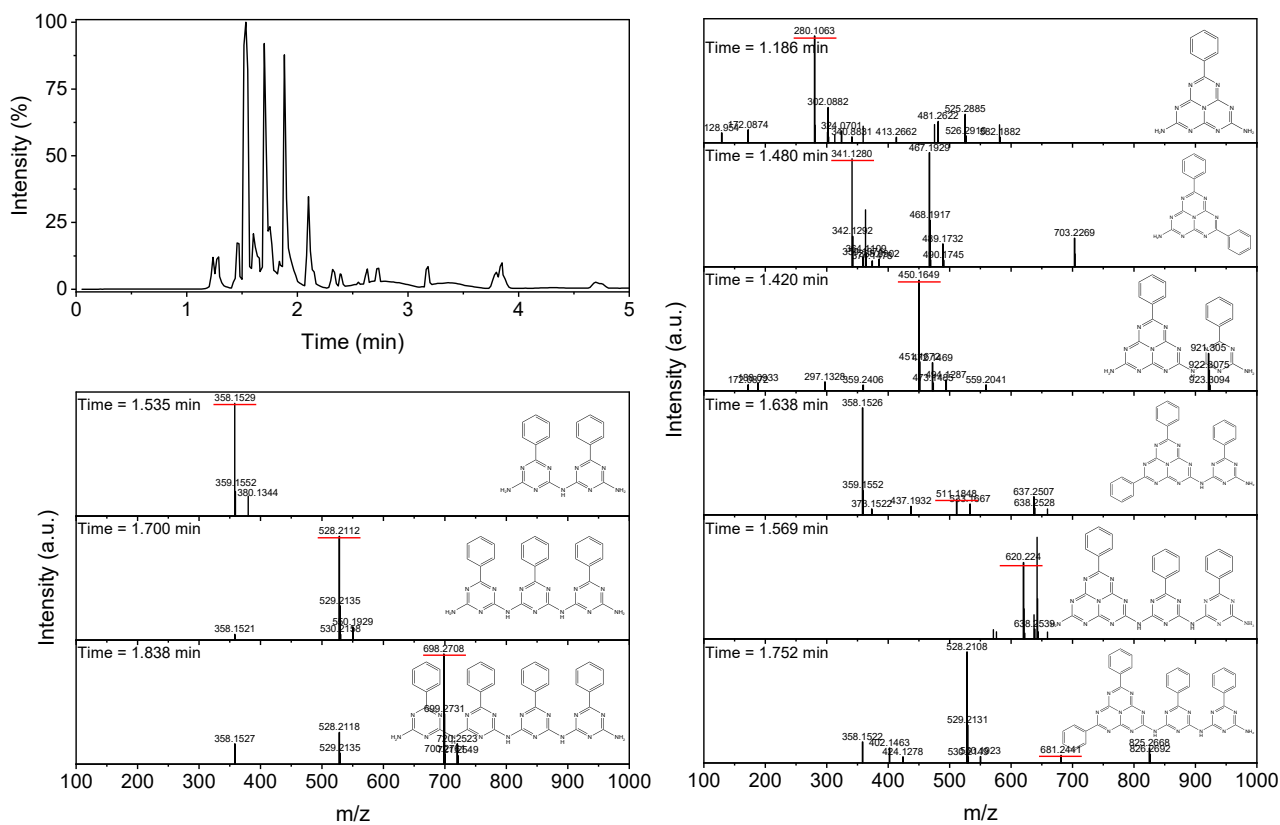

**Figure S2.** LC-MS spectra of DPT multimer (inset: the molecular structures of intermediates).

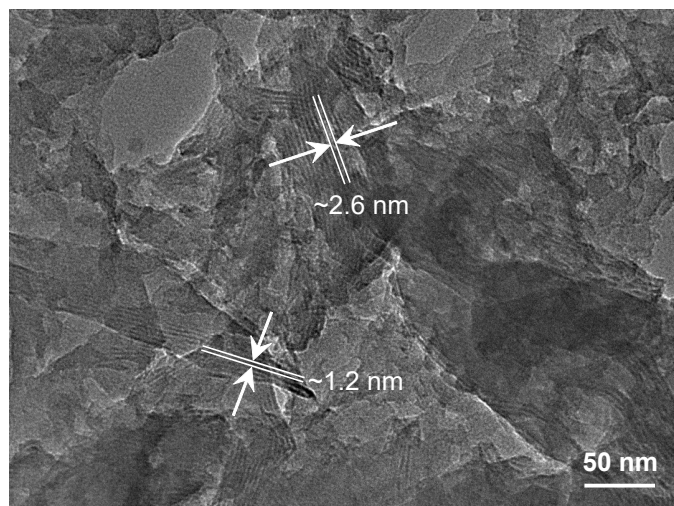

**Figure S3.** TEM image of PhCN.

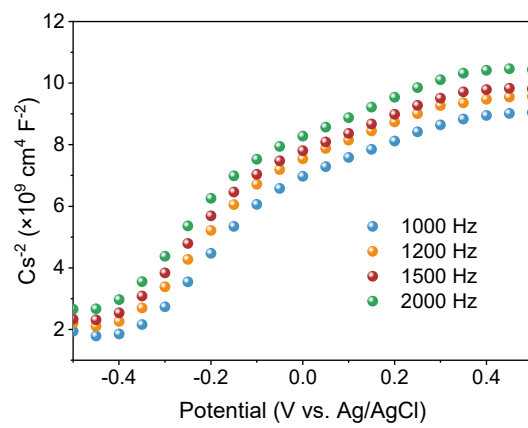

**Figure S4.** M–S plots of PhCN at different frequencies.

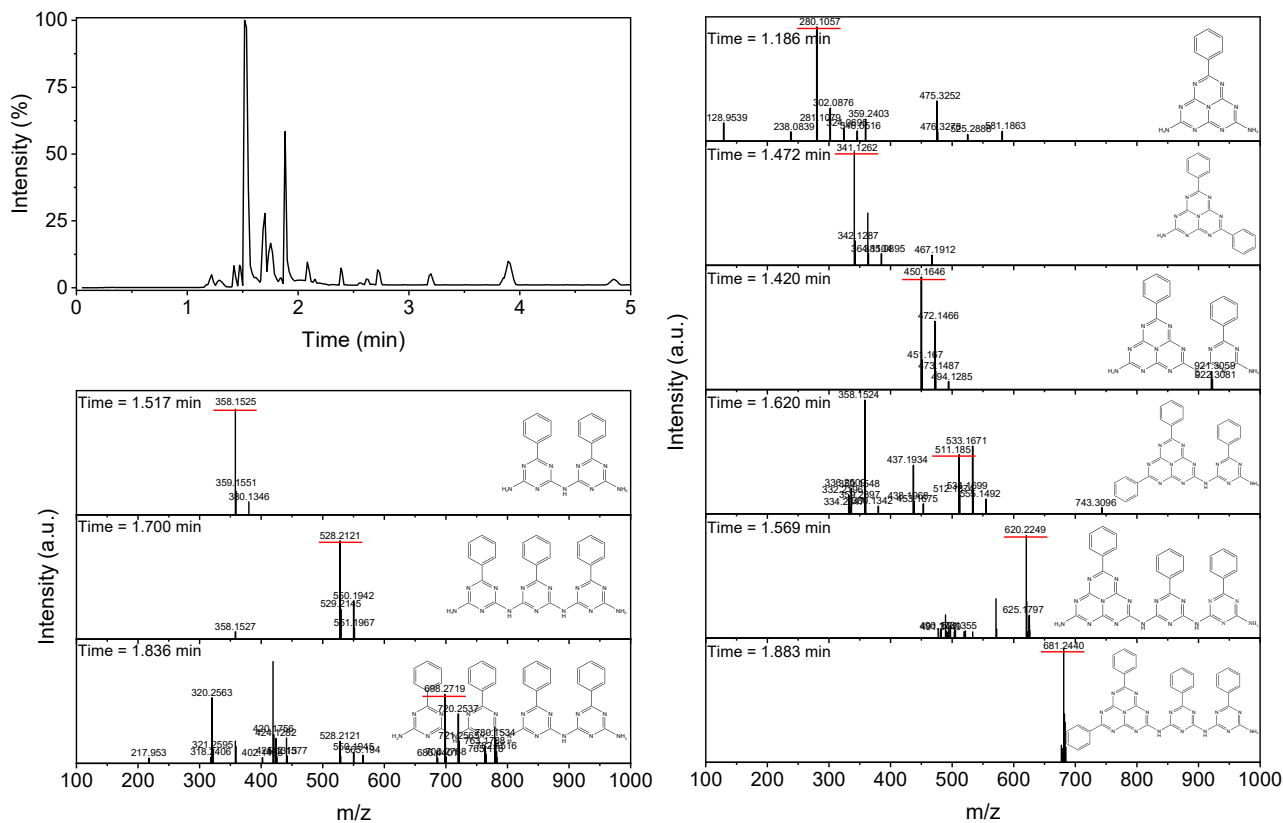

**Figure S5.** LC-MS spectra of the supernatant of DMF washed PhCN (inset: the molecular structures of intermediates).

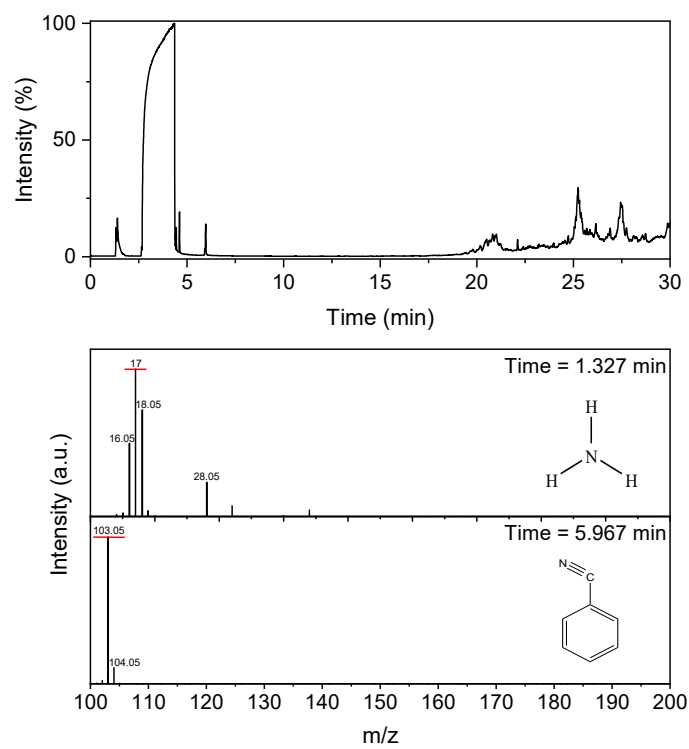

**Figure S6.** GC-MS spectra of exhaust gas (inset: the molecular structures of volatile gases).

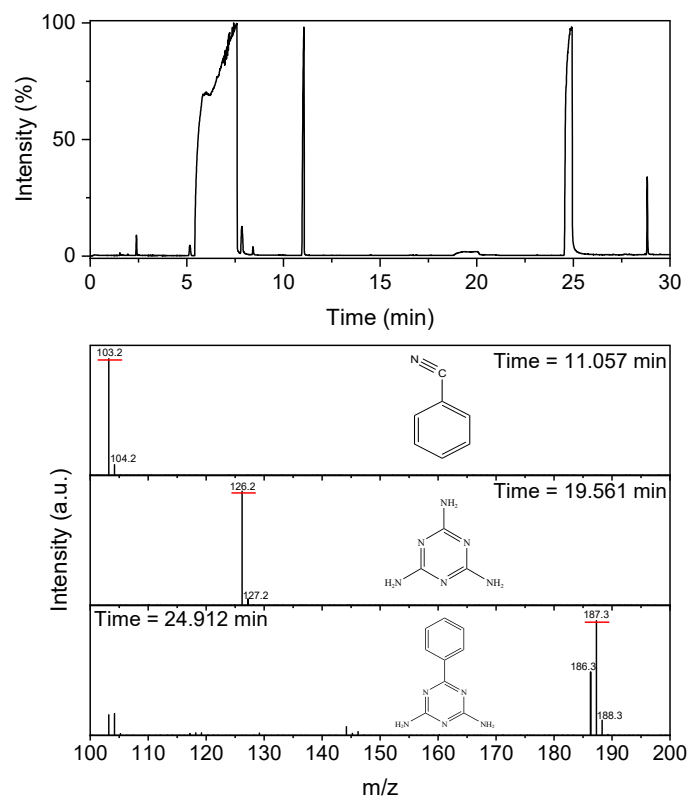

**Figure S7.** GC-MS spectra of downstream deposit in the tuber furnace (inset: the molecular structures of volatile compounds).



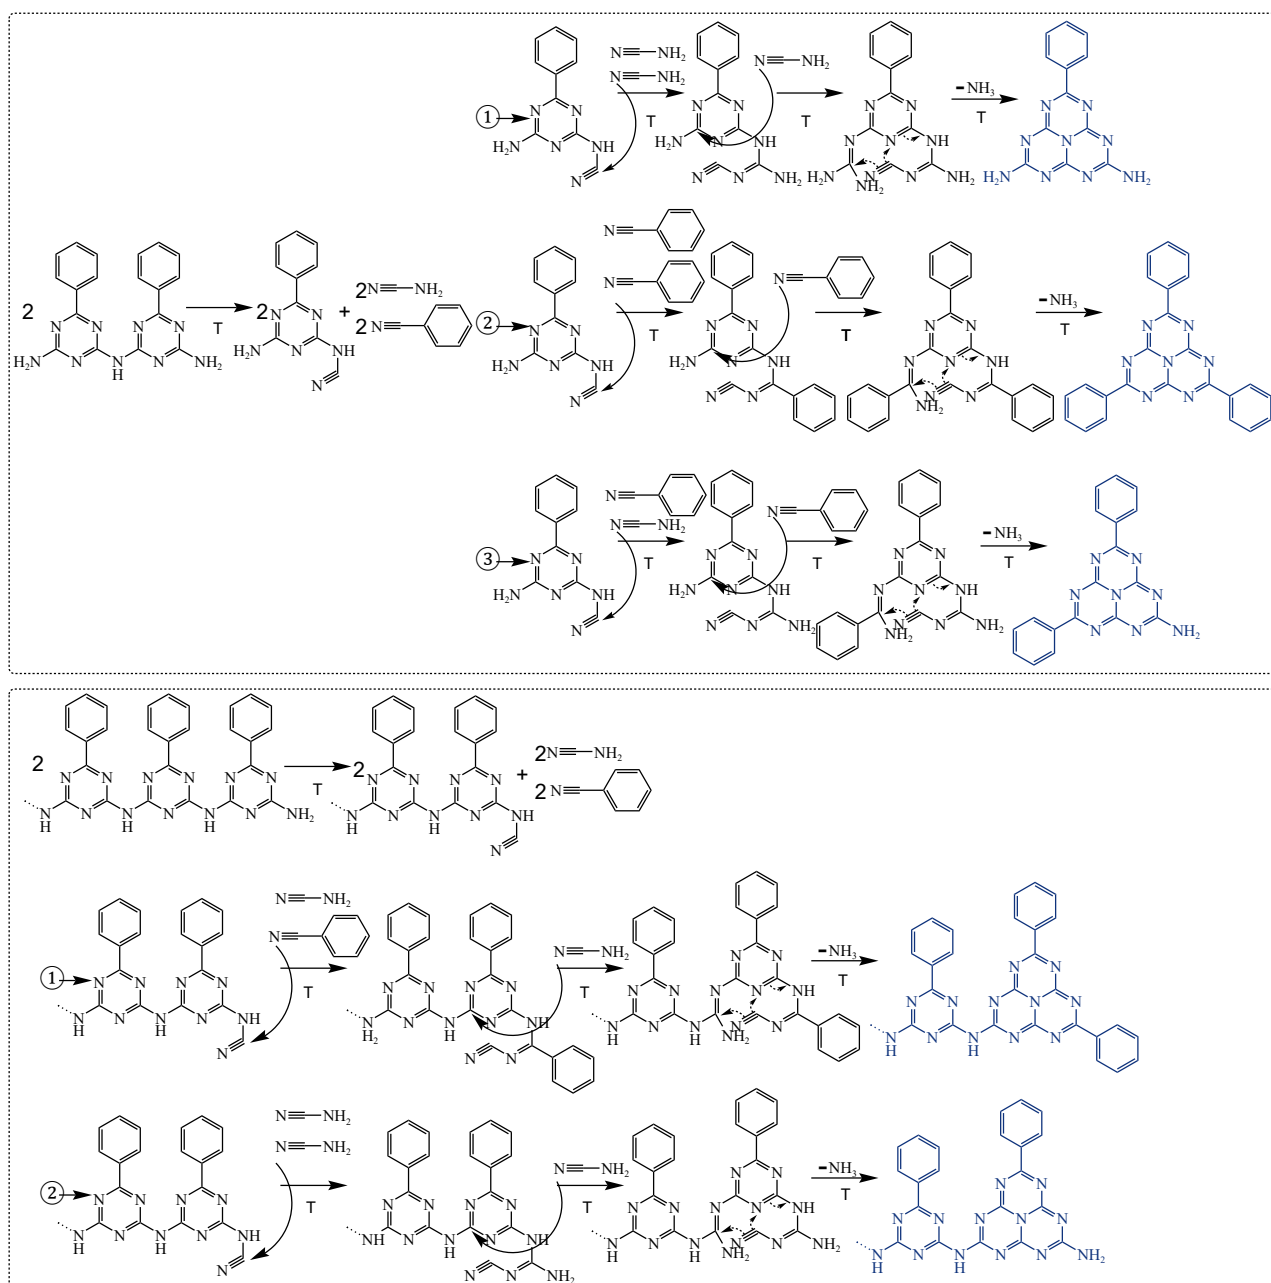

**Figure S8.** Schematic diagram of ring-opening isomerization reaction.

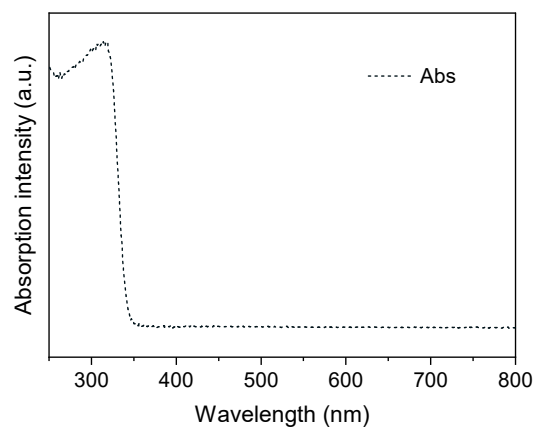

**Figure S9.** UV-vis absorption spectrum of DPT monomer.

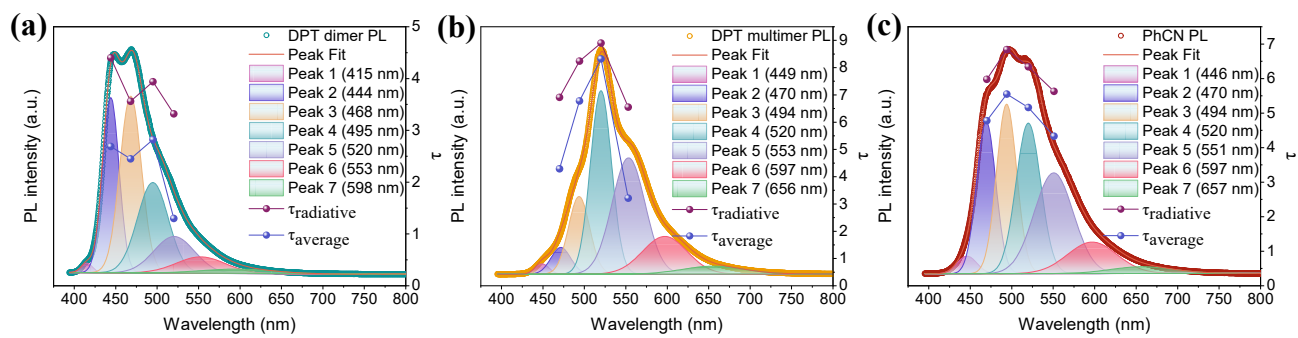

**Figure S10.** The positive correlation graph between PL spectra and PL lifetimes of (a) DPT dimer, (b) DPT multimer, and (c) PhCN.

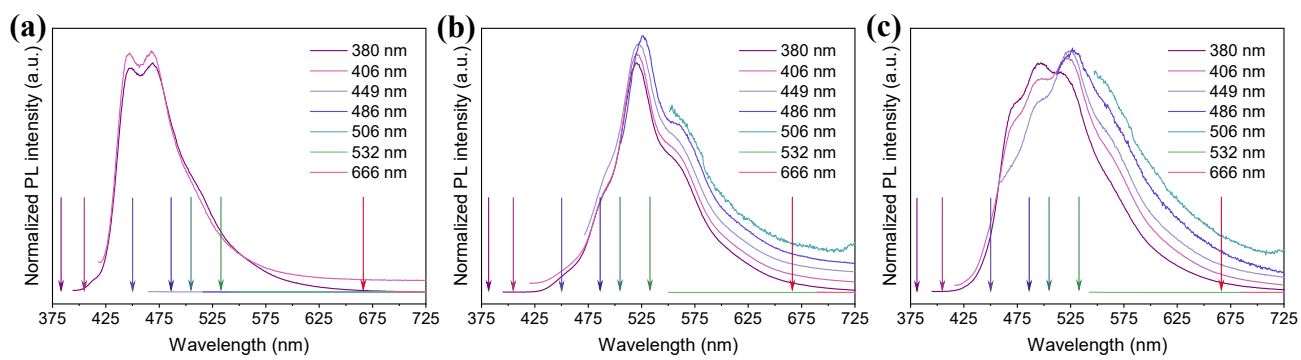

**Figure S11.** Normalized PL spectra of (a) DPT dimer, (b) DPT multimer, and (c) PhCN under different excitation lights.

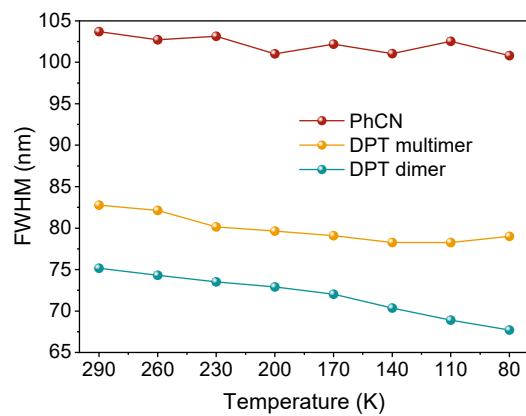

**Figure S12.** The FWHM of DPT dimer, DPT multimer, and PhCN at different temperatures.

**Table S1.** Fitted peak, FWHM and element content of C 1s spectra of DPT monomer, DPT dimer, DPT multimer, and PhCN.

|    |              | DPT<br>monomer | DPT<br>dimer | DPT<br>multimer | PhCN  |
|----|--------------|----------------|--------------|-----------------|-------|
| C1 | Peak BE (eV) | 285.1          | 285.2        | 285.2           | 285.1 |
|    | FWHM (eV)    | 1.3            | 1.4          | 1.3             | 1.3   |
| C2 | Peak BE (eV) | 286.4          | 286.5        | 286.4           | 286.5 |
|    | FWHM (eV)    | 1.1            | 1.2          | 1.2             | 1.0   |
| C3 | Peak BE (eV) | 287.1          | 287.4        | 287.4           | 287.1 |
|    | FWHM (eV)    | 1.1            | 1.2          | 1.4             | 1.4   |
| C4 | Peak BE (eV) | 289.1          | 289.1        | 289.1           | 289.0 |
|    | FWHM (eV)    | 1.4            | 1.3          | 1.3             | 1.1   |

**Table S2.** Fitted peak, FWHM and element content of N 1s spectra of DPT monomer, DPT dimer, DPT multimer, and PhCN.

|    |              | DPT<br>monomer | DPT<br>dimer | DPT<br>multimer | PhCN  |
|----|--------------|----------------|--------------|-----------------|-------|
| N1 | Peak BE (eV) | 398.6          | 398.8        | 398.9           | 398.9 |
|    | FWHM (eV)    | 1.3            | 1.2          | 1.2             | 1.3   |
|    | Atomic (%)   | 61.7           | 58.1         | 47.4            | 63.2  |
| N2 | Peak BE (eV) | 399.6          | 399.9        | 399.9           | 399.7 |
|    | FWHM (eV)    | 1.5            | 1.4          | 1.5             | 1.5   |
|    | Atomic (%)   | 38.3           | 42.0         | 52.6            | 19.9  |
| N3 | Peak BE (eV) | 405.0          | 404.7        | 404.7           | 405.0 |
|    | FWHM (eV)    | 3.4            | 3.4          | 3.4             | 3.4   |
|    | Atomic (%)   | -              | -            | -               | -     |
| N4 | Peak BE (eV) | -              | -            | -               | 401.0 |
|    | FWHM (eV)    | -              | -            | -               | 1.7   |
|    | Atomic (%)   | -              | -            | -               | 16.9  |

**Table S3.** PL fitting data of DPT dimer, DPT multimer, and PhCN.

| Samples      | Peak fit | Peak center (nm) | Peak area | Peak area percentage (%) |
|--------------|----------|------------------|-----------|--------------------------|
| DPT dimer    | Peak 1   | 415              | 0.71      | 0.87                     |
|              | Peak 2   | 444              | 19.33     | 23.63                    |
|              | Peak 3   | 468              | 25.57     | 31.26                    |
|              | Peak 4   | 495              | 18.76     | 22.93                    |
|              | Peak 5   | 520              | 9.92      | 12.13                    |
|              | Peak 6   | 553              | 5.37      | 6.56                     |
|              | Peak 7   | 598              | 2.13      | 2.61                     |
| DPT multimer | Peak 1   | 449              | 0.94      | 1.15                     |
|              | Peak 2   | 470              | 3.53      | 4.32                     |
|              | Peak 3   | 494              | 11.00     | 13.46                    |
|              | Peak 4   | 520              | 25.98     | 31.78                    |
|              | Peak 5   | 553              | 25.87     | 31.65                    |
|              | Peak 6   | 597              | 11.21     | 13.71                    |
|              | Peak 7   | 656              | 3.20      | 3.91                     |
| PhCN         | Peak 1   | 446              | 2.33      | 2.13                     |
|              | Peak 2   | 470              | 19.66     | 17.96                    |
|              | Peak 3   | 494              | 22.96     | 20.97                    |
|              | Peak 4   | 520              | 24.88     | 22.73                    |
|              | Peak 5   | 551              | 26.45     | 24.16                    |
|              | Peak 6   | 597              | 10.41     | 9.51                     |
|              | Peak 7   | 657              | 2.78      | 2.54                     |



**Table S4.** PL lifetime of DPT dimer, DPT multimer, and PhCN.

| Samples      | Emission wavelength (nm) | $\tau_1$ (ns) | $\tau_2$ (ns) | $\tau_3$ (ns) | $\tau_{ave}$ (ns) |
|--------------|--------------------------|---------------|---------------|---------------|-------------------|
| DPT dimer    | 444                      | 1.09          | 4.40          | -             | 2.69              |
|              | 468                      | 0.81          | 3.56          | -             | 2.45              |
|              | 495                      | 0.81          | 3.94          | -             | 2.82              |
|              | 520                      | 0.34          | 3.32          | -             | 1.30              |
| DPT multimer | 470                      | 0.31          | 1.76          | 6.91          | 4.29              |
|              | 494                      | 1.62          | 8.24          | -             | 6.78              |
|              | 520                      | 0.91          | 8.90          | -             | 8.32              |
|              | 553                      | 0.14          | 6.55          | -             | 3.21              |
| PhCN         | 470                      | 0.99          | 5.98          | -             | 4.78              |
|              | 494                      | 1.05          | 6.84          | -             | 5.55              |
|              | 520                      | 0.95          | 6.34          | -             | 5.16              |
|              | 551                      | 0.91          | 5.63          | -             | 4.33              |
